# Supplementary material
Source: PubMed Central journal article supplement (PMC5531204)
Supplement: NIHMS882162-supplement-1.pdf [file NIHMS882162-supplement-1.pdf]

A)

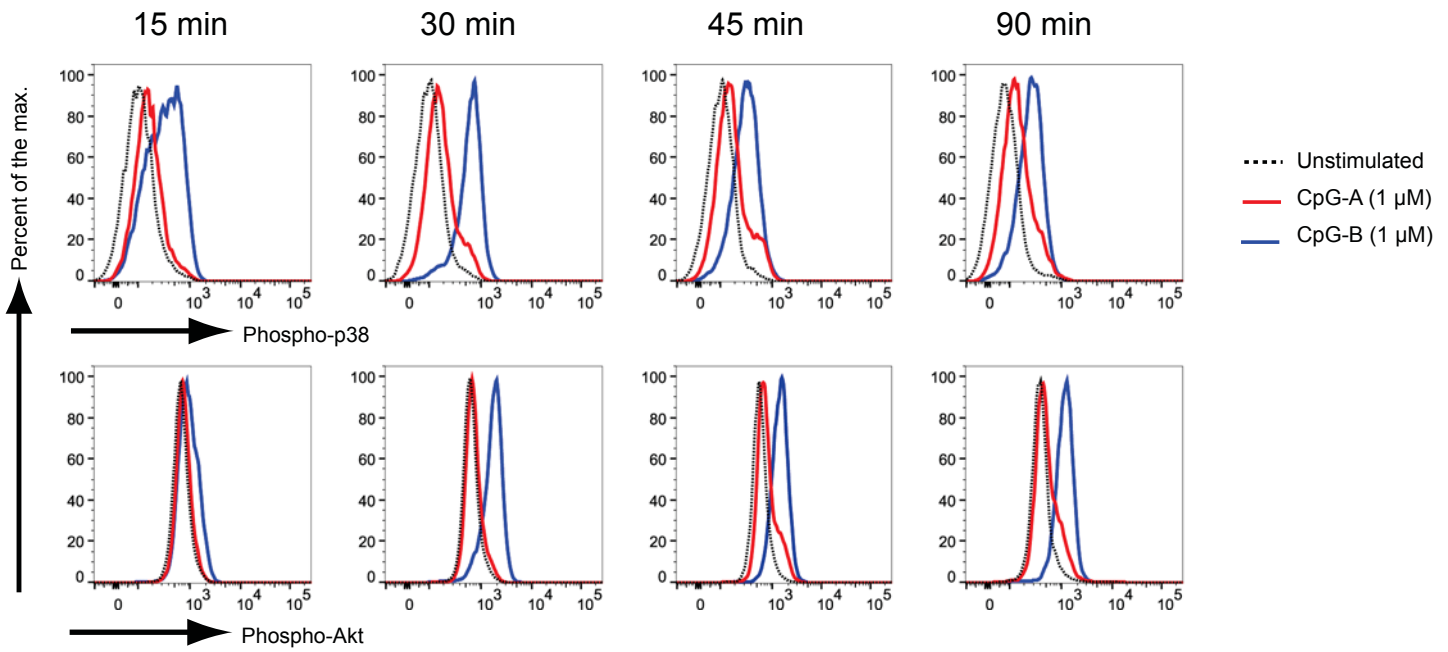

B)

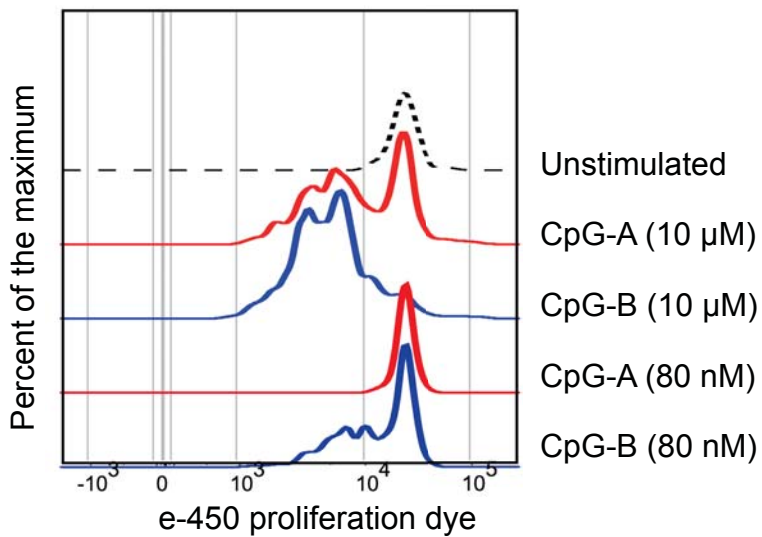

C)

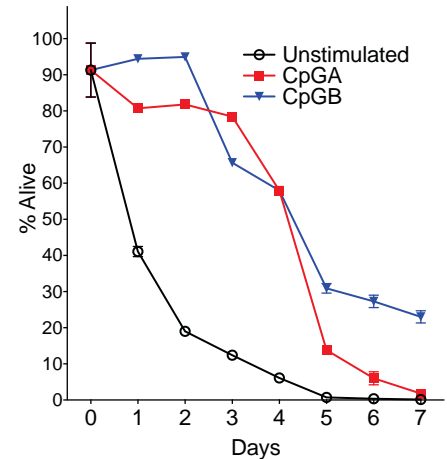

**Supplementary Figure 1) *In vitro* activation of B cells.** A) Representative histogram overlays showing the time dependent changes in the phosphorylation of p38 (top panel) and Akt (bottom panel) after stimulation of purified B cells as explained in Figure 1A. B) Representative histograms showing the proliferative activity of B cells 48 h after stimulation with two different concentrations of CpG-A or CpG-B as indicated in Figure 1C. C) Graph showing the change in the viability of purified B cells in 96 well flat bottom culture plate after being seeded at a density of  $1.5 \times 10^5$  cells/well and incubated in 250  $\mu$ l complete media either alone or supplemented with 2  $\mu$ M CpG. Data represents two independent experiments (n=4).

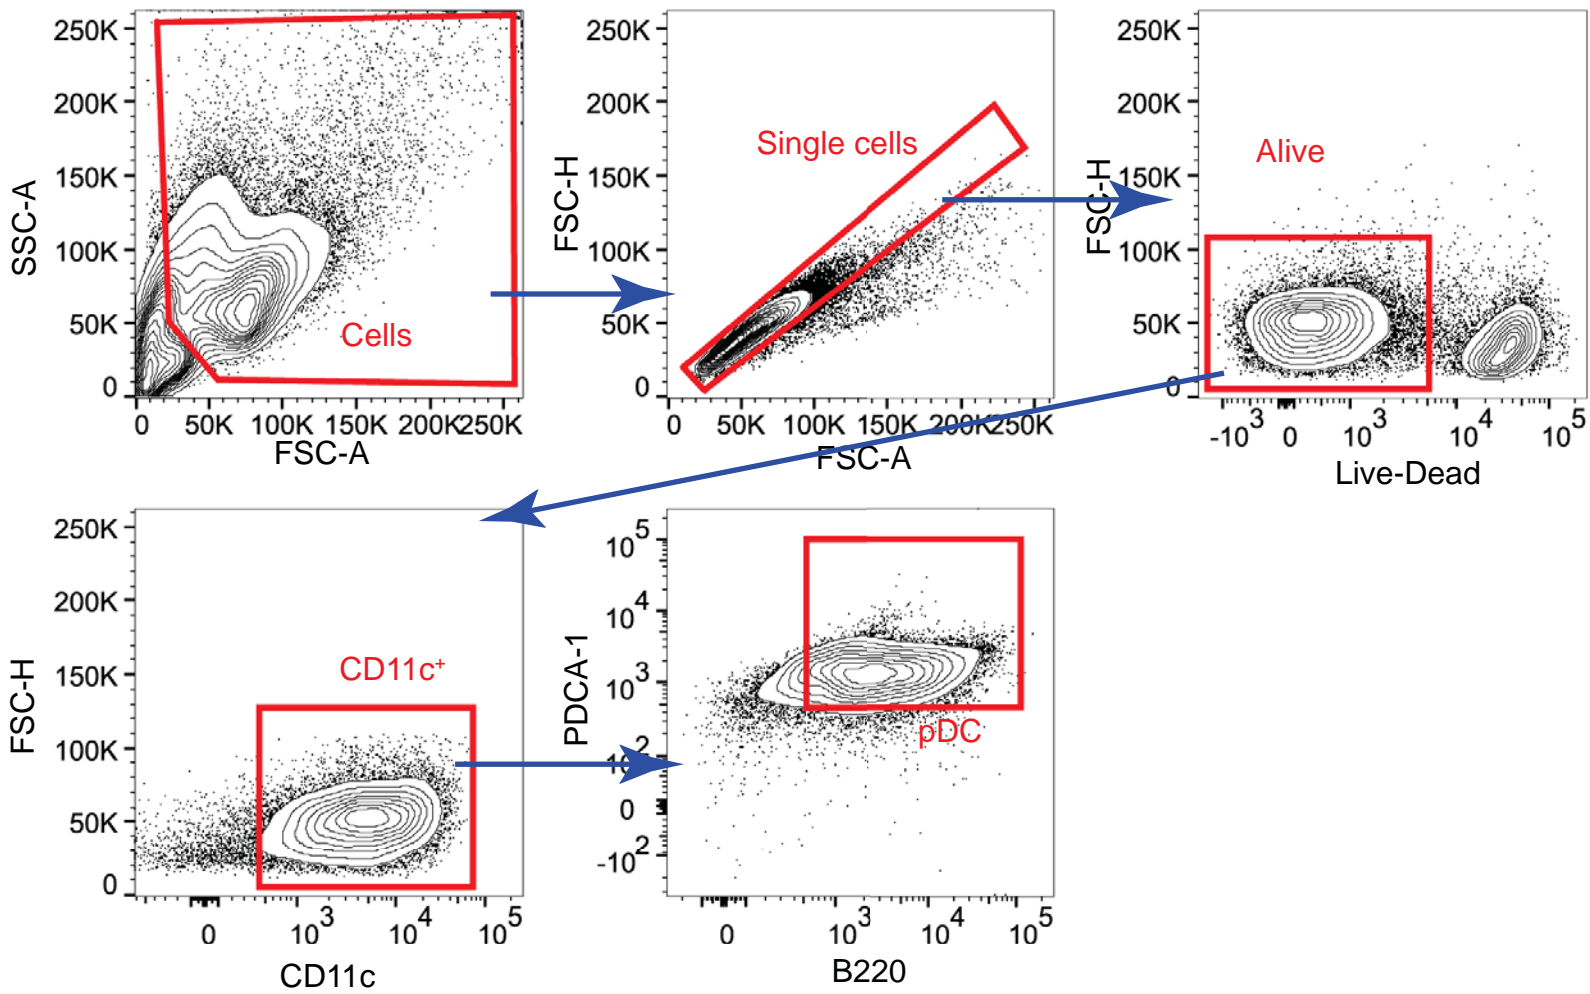

**Supplementary Figure 2)** Stepwise gating strategy showing the flow cytometry gating of the *in vitro* differentiated pDCs used in Figure 3.

| <b>Antibody</b>                                   | <b>Fluorochrome</b> | <b>Vendor</b> | <b>Catalog No</b> |
|---------------------------------------------------|---------------------|---------------|-------------------|
| Anti-mouse CD45R/B220                             | AF-700              | Biolegend     | 103232            |
| Anti-mouse CD45R/B220                             | AF-488              | Biolegend     | 103225            |
| Anti-mouse CD45R/B220                             | PE                  | Biolegend     | 103208            |
| Anti-mouse CD45R/B220                             | BV-785              | Biolegend     | 103246            |
| Anti-mouse CD45R/B220                             | BV-605              | Biolegend     | 103244            |
| Anti-mouse CD45R/B220                             | BV-421              | Biolegend     | 103240            |
| Anti-mouse CD45R/B220                             | BV-510              | Biolegend     | 103247            |
| Anti-mouse CD19                                   | BV-605              | Biolegend     | 115540            |
| Anti-mouse CD19                                   | BV421               | Biolegend     | 115538            |
| Anti-mouse CD19                                   | AF-647              | Biolegend     | 115522            |
| Anti-mouse CD11c                                  | AF-647              | Biolegend     | 117312            |
| Anti-mouse PDCA-1                                 | Pacific Blue        | Biolegend     | 127108            |
| Anti-mouse CD16/32                                | -                   | Biolegend     | 101302            |
| Anti-mouse CD4                                    | BV605               | Biolegend     | 100548            |
| Anti-mouse CD132 (common $\gamma$ chain)          | PE                  | Biolegend     | 132305            |
| Anti-mouse CD107a (LAMP-1)                        | PE                  | Biolegend     | 121611            |
| Anti-mouse CD155 (PVR)                            | PE                  | Biolegend     | 132205            |
| Anti-mouse CD268 (BAFF-R)                         | PE                  | Biolegend     | 134103            |
| Anti-mouse CD274 (B7-H1, PD-L1)                   | PE                  | Biolegend     | 124307            |
| Anti-mouse CD279 (PD-1)                           | PE                  | Biolegend     | 135205            |
| Anti-mouse CD317 (BST2, PDCA-1)                   | PE                  | Biolegend     | 127103            |
| Anti-mouse/human CD44                             | PE                  | Biolegend     | 103007            |
| Anti-mouse CD49b (pan-NK cells)                   | PE                  | Biolegend     | 108907            |
| Anti-mouse/rat CD81                               | PE                  | Biolegend     | 104905            |
| Anti-mouse CD98 (4F2)                             | PE                  | Biolegend     | 128207            |
| Anti-mouse GARP (LRRC32)                          | PE                  | Biolegend     | 142903            |
| Anti-mouse LAP (TGF- $\beta$ 1)                   | PE                  | Biolegend     | 141403            |
| Anti-mouse CD107b (Mac-3)                         | PE                  | Biolegend     | 108505            |
| Anti-mouse Notch 2                                | PE                  | Biolegend     | 130707            |
| Anti-mouse CD223 (LAG-3)                          | PE                  | Biolegend     | 125207            |
| Anti-mouse CD25                                   | PE                  | Biolegend     | 102007            |
| Anti-human/mouse CD49f                            | PE                  | Biolegend     | 313611            |
| Anti-mouse CD54                                   | PE                  | Biolegend     | 116107            |
| Anti-mouse CD80                                   | PE                  | Biolegend     | 104707            |
| Anti-mouse CD83                                   | PE                  | Biolegend     | 121507            |
| Anti-mouse CD86                                   | PE                  | Biolegend     | 105007            |
| Anti-mouse I-A/I-E                                | PE                  | Biolegend     | 107607            |
| Anti-mouse Allergin-1                             | PE                  | Biolegend     | 141805            |
| Anti-mouse CD135                                  | PE                  | Biolegend     | 135305            |
| Anti-mouse CD24                                   | PE                  | Biolegend     | 101807            |
| Anti-mouse CD36                                   | PE                  | Biolegend     | 102605            |
| Anti-mouse CD93 (AA4.1, early B lineage)          | PE                  | Biolegend     | 136503            |
| Anti-mouse CD62L                                  | PE                  | Biolegend     | 104407            |
| Anti-mouse CD66a (CEACAM1a)                       | PE                  | Biolegend     | 134505            |
| Anti-mouse CD90.2                                 | PE                  | Biolegend     | 105307            |
| Anti-human/mouse integrin $\beta$ 7               | PE                  | Biolegend     | 121005            |
| Anti-mouse LPAM-1 (Integrin $\alpha$ 4 $\beta$ 7) | PE                  | Biolegend     | 120605            |
| Anti-mouse PIR-A/B                                | PE                  | Biolegend     | 144103            |
| Anti-mouse CD272 (BTLA)                           | PE                  | Biolegend     | 134803            |
| Anti-mouse CD275 (B7-RP1, ICOSL, B7H2)            | PE                  | Biolegend     | 107405            |
| Anti-mouse CD30                                   | PE                  | Biolegend     | 102306            |
| Anti-mouse CD51                                   | PE                  | Biolegend     | 104105            |
| Anti-mouse CD45.2                                 | AF-488              | Biolegend     | 109816            |

**Supplemental Table 1:** Product details of the antibodies used in flow cytometry experiments are listed
